# Supplementary material
Source: PubMed Central journal article supplement (PMC7093130)
Supplement: IAI.00709-19-s0001.pdf [file IAI.00709-19-s0001.pdf]

## Inoculated Mouse Pup Weight

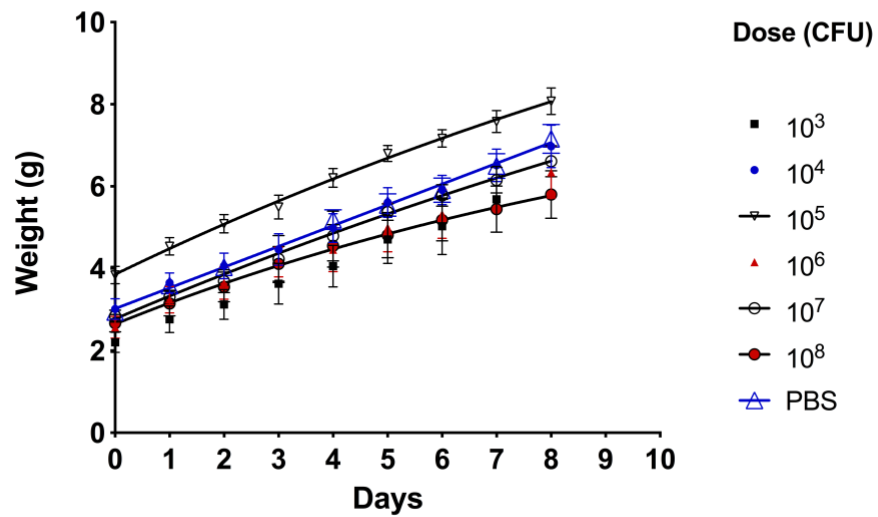

1

2

3 **Figure S1.** *Pup weight unaffected by inocula <10<sup>8</sup> CFU.* The weight (g) of pups over the course of  
4 Day 1-8 post-inoculation in litters inoculated with MGAS10870 and control litters administered  
5 PBS. Mean and SD of pup weights in experimental litters is shown. Linear regression of data for  
6 selected inocula (10<sup>5</sup>, 10<sup>7</sup>, 10<sup>8</sup>, PBS control) is shown to indicate rate of weight gain. Litters are  
7 indicated by inocula (CFU) administered in the legend adjacent to the graphs and days post-  
8 inoculation are enumerated on the x-axis.

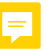

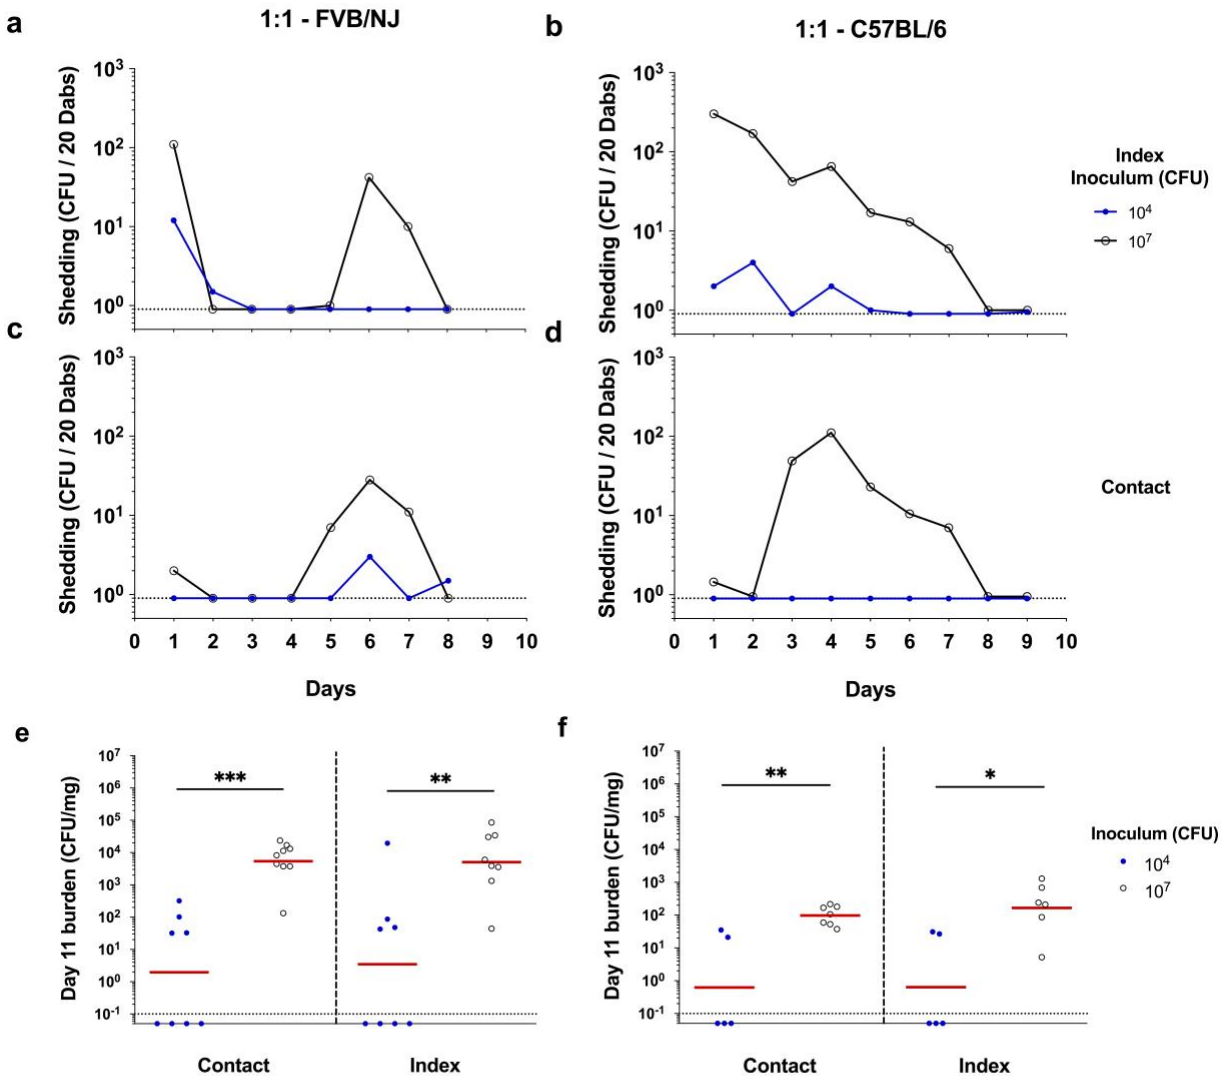

**Figure S2:** Shedding and transmission of *emm3* serotype GAS in infant FVB/NJ and C57BL/6 mice is inoculum-dependent.

9

10 **Figure S2.** Shedding and transmission of *emm3* serotype GAS in infant FVB/NJ and C57BL/6 mice  
 11 is inoculum-dependent. **(a)** Shedding titers (CFU) of MGAS10870 from index mice in FVB/NJ and  
 12 **(b)** C57BL/6 litters inoculated at a 1:1 index-to-contact ratios were detected throughout the  
 13 monitoring period (Days 1-9 post-inoculation). **(c,d)** The shedding titers of MGAS10870 from  
 14 contact mice in the same Days such litters were likewise assessed. The median of shed titers detected  
 15 daily is shown. Litters are indicated by inocula (CFU) administered in the legend adjacent to the  
 16 graphs and days post-inoculation are enumerated on the x-axis. **(e)** The intranasal GAS tissue  
 17 burden from contact and index mice in FVB/NJ and **(f)** C57BL/6 litters were likewise assessed at

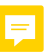

18 day 11 post-inoculation. The geometric mean of GAS burden (red line) is shown to indicate mean  
 19 colonization rate and burden. Litters are indicated by inocula (CFU) administered on the x-axis.  
 20 Limit of detection is indicated by dotted line (shedding titer = 1 CFU; colonization burden = 0.1  
 21 CFU/mg). Statistically significant differences in mean colonization burden were determined  
 22 between inocula by Mann-Whitney U-test (\* $p < 0.05$ , \*\* $p < 0.01$ , \*\*\* $p < 0.001$ , # $p < 0.0001$ ).

23  
 24  
 25

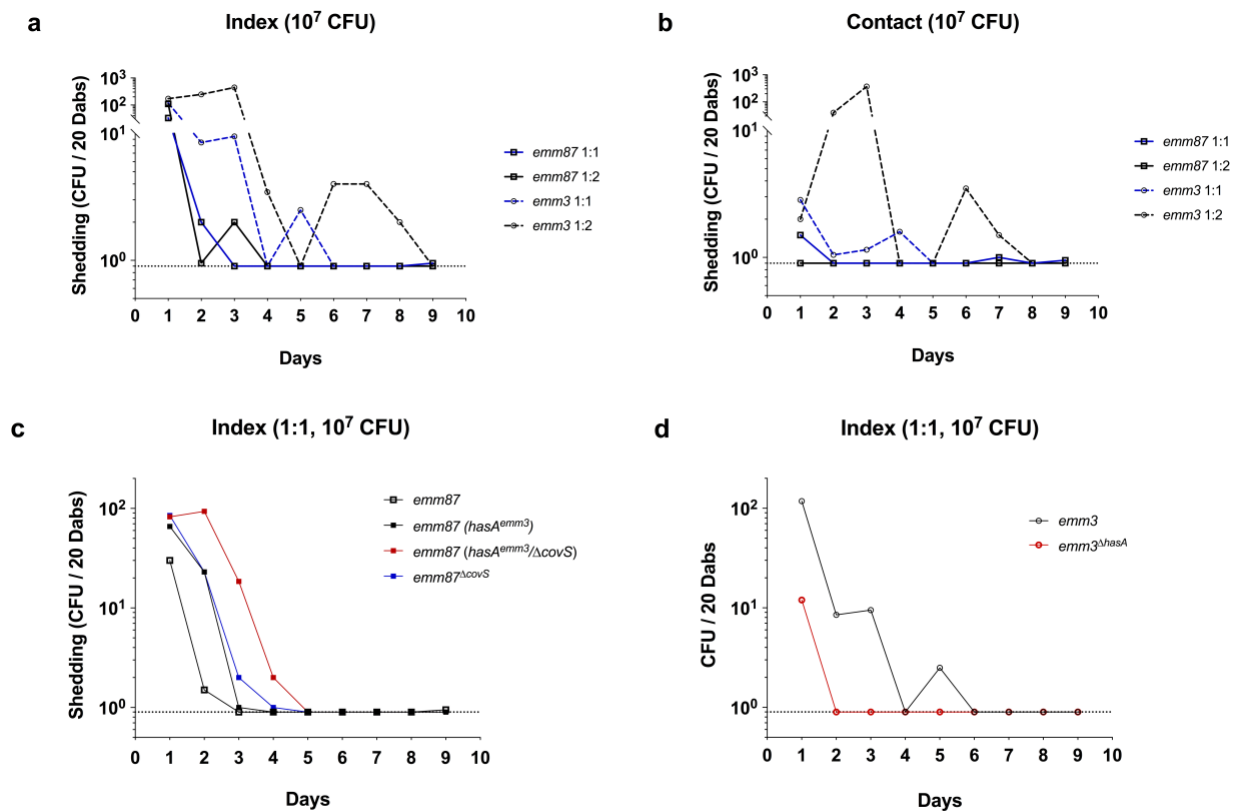

26 **Figure S3.** Production of hyaluronic acid capsule enhances GAS shedding from CD-1 mice

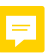

26

27 **Figure S3.** Production of hyaluronic acid capsule enhances GAS shedding from CD-1 mice. **(a)**  
 28 Shedding titers (CFU) of TSPY55 (*emm87*; solid lines) from index and **(b)** contact mice in CD-1  
 29 litters inoculated with  $10^7$  CFU at a 1:1 (blue) and 1:2 (black) index-to-contact ratios were  
 30 detected throughout the monitoring period (Days 1-9 post-inoculation) and compared to  
 31 detected shed titers of MGAS10870 (*emm3*; dashed lines). **(c)** The shedding titers (CFU) from  
 32 index mice in CD-1 litters inoculated at a 1:1 index-to-contact ratio with  $10^7$  CFU of *emm87* strains

33 mutagenized in *hasA* and *covS* are compared to shedding titers of TSPY55 (*emm87*) throughout  
 34 the monitoring period. **(d)** The shedding titers from index mice in CD-1 litters inoculated at a 1:1  
 35 index-to-contact ratio with  $10^7$  CFU of *emm3<sup>AhasA</sup>* is compared to shedding titers of MGAS10870  
 36 (*emm3*) throughout the monitoring period. The median of shed titers detected daily is shown.  
 37 Shedding titers detected from *emm3* strains shown in Figure 2 are reproduced here for ease of  
 38 comparison. Litters are indicated by strain name in the legend adjacent to the graphs and days  
 39 post-inoculation are enumerated on the x-axis.

40

41 **Table S1.** Primers and plasmids used in study.

| Primer | Sequence                                                             | Reference  |
|--------|----------------------------------------------------------------------|------------|
| MSP114 | TGGGTATTATAATGCATTC                                                  | This Study |
| MSP116 | TTTGCAATTAGTTCTGGGCT                                                 | This Study |
| MSP121 | GTGCCTATTTTTAAAAAACTTTAATTGTTTTATCCAATACATGTTATAATAACTA<br>TAAC      | This Study |
| MSP122 | TTATTTAAAAATAGTGACCTTTTTACGTGTTCTTATAATTTTTTTAATCTGTTAT<br>TTAAATAG  | This Study |
| MSP123 | GTTATAGTTATTATAACATGTATTGGATAAAACAATTAAAGTTTTTTTAAAAATA<br>GGCAC     | This Study |
| MSP124 | CTATTTAAATAACAGATTAAAAAAATTATAAGGAACACGTAAAAAGGTCACTAT<br>TTTTAAATAA | This Study |
| MSP408 | ATATGAGATGGATCCCATAGTTTTTC                                           | This Study |
| MSP409 | ACTGTATTAAAGATATCGAATCAAG                                            | This Study |
| MSP410 | CGTTATTCGTGAGAAATAAGTCATATGATTGAACAAGATGGATTGCACG                    | This Study |
| MSP411 | CGTGCAATCCATCTTGTTCAATCATATGACTTATTTCTCACGAATAACG                    | This Study |
| MSP412 | CACATTAACAATGCCTTAAGCTACTTCAGAAGAAGCTCGTCAAGAAGGCG                   | This Study |
| MSP413 | CGCCTTCTTGACGAGTTCTTCTGAAGTAGCTTAAGGCATTGTTAATGTG                    | This Study |
| MSP459 | AAACTCGAGAACATCGATCATCCCCAATGC                                       | This Study |
| MSP460 | AAAGGATCCAGATTGATGAACTGCTCTTTTT                                      | This Study |

| Plasmid | Description                                                                                                                             |            |
|---------|-----------------------------------------------------------------------------------------------------------------------------------------|------------|
| pJL1055 | <i>E. coli</i> Gram-positive shuttle vector derived from pWV01 for allelic replacement mutagenesis                                      | (3)        |
| pMAS27  | A 1930bp fragment spanning N-terminus of <i>hasA</i> and upstream promoter region in pJL1055 vector                                     | This study |
| pMAS20  | Kanamycin cassette ( <i>aph</i> ) between regions of homology flanking <i>covS</i> coding sequence in pCR <sup>TM</sup> II vector       | This study |
| pJSF29  | Spectinomycin cassette ( <i>aad9</i> ) between regions of homology flanking <i>hasA</i> coding sequence in pCR <sup>TM</sup> 2.1 vector | This study |

42

43

#### 44 Supplemental Materials and Methods

45

46 *Generation of isogenic mutants in MGAS10870 and TSPY55.* Plasmids and primers used in this  
47 study are listed in Table S1. We used a previously described procedure for generating the capsule  
48 and *covS* mutants in MGAS10870 (*emm3*) and TSPY55 (*emm87*) strains 3 (1, 2). Briefly, the *hasA*  
49 gene in MGAS10870 was replaced with a spectinomycin resistance cassette (*aad9*) using plasmid  
50 pJSF29 to generate *emm3*<sup>Δ*hasA*</sup>. Regions flanking *hasA* (*SpyM3\_1851*) were amplified using primer  
51 pairs MSP114/MSP124 and MSP116/MSP123. The *aad9* cassette was amplified using primers  
52 MSP121 and MSP122. The *hasA*-flanking regions and *aad9* cassette were joined by overlap  
53 extension PCR using MSP114 and MSP116. The PCR product was given an A overhang with GoTaq  
54 and ligated into pCR<sup>TM</sup>2.1-TOPO<sup>®</sup> using TOPO<sup>®</sup> TA cloning kit (ThermoFisher, K450001) per the  
55 manufacturer's instructions to generate pJSF29.

56 The *emm87*(*hasA*<sup>*emm3*</sup>) mutant was generated in the TSPY55 background using plasmid  
57 pMAS27. A 1930bp fragment spanning the 783 N-terminal nucleotides of *hasA* and the upstream  
58 promoter was amplified from MGAS10870 using primers MSP459 and MSP460. The PCR product  
59 was inserted into the pJL1055 vector using BamHI and XhoI restriction sites to generate pMAS27.  
60 Allelic replacement using pMAS27 repaired the single nucleotide frameshift insertion in the  
61 TSPY55 *hasA* coding sequence and replaced the native *hasA* promoter with that of the *emm3*  
62 serotype.

63 The *covS* gene was deleted by allelic replacement with a kanamycin resistance cassette  
64 (*aph*) using plasmid pMAS20 to generate the *emm87<sup>ΔcovS</sup>* and *emm87(hasA<sup>emm3</sup>/ΔcovS)* strains.  
65 Regions flanking *covS* (*SpyM3\_0245*) were amplified using primer pairs MSP408/MSP411 and  
66 MSP413/MSP409. The *aph* cassette was amplified using primers MSP410 and MSP412. The *covS*-  
67 flanking regions and *aph* cassette were joined by overlap extension PCR using MSP408 and  
68 MSP409 primers. The PCR product was inserted into a pCR<sup>TM</sup>II-TOPO<sup>®</sup> vector to generate  
69 pMAS20. The pJSF29 and pMAS20 plasmids were linearized by restriction digest with XmnI to  
70 disrupt the ampicillin resistance cassette of the pCR<sup>TM</sup>2.1-TOPO<sup>®</sup> and pCR<sup>TM</sup>II-TOPO<sup>®</sup> vectors  
71 prior to transformation into GAS. The *aph* and *aad9* resistance cassettes were stably integrated  
72 in mutagenized strains as confirmed by PCR amplification following growth in the absence of  
73 antibiotic selection. PCR amplification was performed using either the Phusion<sup>®</sup> (NEB, #M0530S)  
74 or Q5<sup>®</sup> (NEB, #M049S) high fidelity polymerases according to manufacturer's specifications.

75

76 *Statistical methods.* For mouse model experimentation, 3 pup litters were used per each GAS  
77 strain, inoculum and index-to-contact ratio tested, unless otherwise indicated. A minimum n=12  
78 total infant mice were used per test condition for adequate study power ( $\alpha=0.05$ ;  $\beta=0.2$ ). The  
79 geometric mean of shed titers and bacterial intranasal tissue burden were calculated to assess  
80 streptococcal output, and the rates of transmission and persistence. Differences in transmission  
81 frequency between GAS strains and experimental conditions (i.e. index-to-contact ratios and  
82 inocula) were tested for statistical significance by comparison of numbers of infected contact  
83 mice using 2X2 contingency test (Fisher's exact test, two tailed;  $p<0.05$ ). An unpaired U-test  
84 (Mann-Whitney) was used to assess statistical significance of differences in mean colonization  
85 burden and median shedding titers between mouse experimental data sets ( $p<0.05$ ). For assays  
86 measuring hyaluronan capsule production, epithelial cell adherence and survival in whole blood,  
87 an unpaired t-test was used to assess statistical significance of differences between data sets  
88 ( $p<0.05$ ).

89

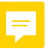

90 **References**

- 91 1. **Flores AR, Jewell BE, Olsen RJ, Shelburne SA, 3rd, Fittipaldi N, Beres SB, Musser JM.**  
92 2014. Asymptomatic carriage of group A streptococcus is associated with elimination of  
93 capsule production. *Infect Immun* **82**:3958-3967.
- 94 2. **Flores AR, Olsen RJ, Wunsche A, Kumaraswami M, Shelburne SA, 3rd, Carroll RK,**  
95 **Musser JM.** 2013. Natural variation in the promoter of the gene encoding the Mga  
96 regulator alters host-pathogen interactions in group a Streptococcus carrier strains.  
97 *Infect Immun* **81**:4128-4138.
- 98 3. **Li J, Kasper DL, Ausubel FM, Rosner B, Michel JL.** 1997. Inactivation of the alpha C  
99 protein antigen gene, bca, by a novel shuttle/suicide vector results in attenuation of  
100 virulence and immunity in group B Streptococcus. *Proc Natl Acad Sci U S A* **94**:13251-  
101 13256.

102

103
